# Supplementary material for: A novel ratiometric dual-emission fluorescence magnetic nanohybrid for HIgG immunoassay
Source: Royal Society of Chemistry journal article supplement (doi:10.1039/c6nj00398b), 2016-01-01
Supplement: c6nj00398b1.pdf [file c6nj00398b1.pdf]

## A novel ratiometric dual-emission fluorescence magnetic nanohybrid

### for HlgG Immunoassay

### Support information

Tingting Xia<sup>1</sup>, Qiang Ma<sup>1</sup>, Yang Li, Xu Yan and Xingguang Su\*

Department of Analytical Chemistry, College of Chemistry, Jilin University, Qianwei

Road 10, Changchun, 130012, China

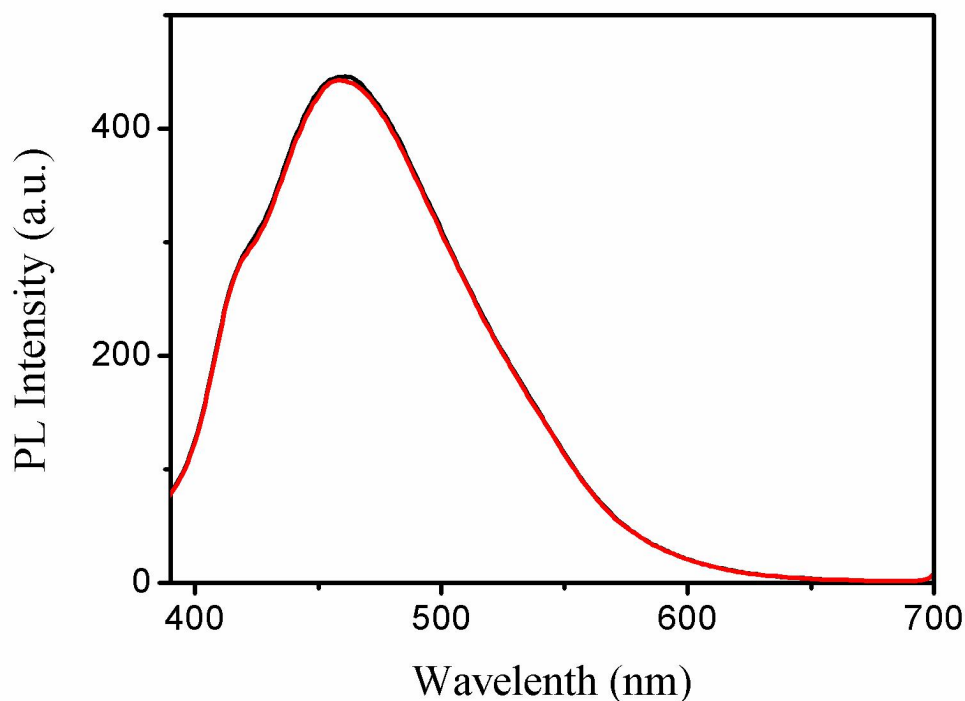

Figure S1. The fluorescence spectra of  $\text{Fe}_3\text{O}_4@\text{C}$  NPs and AuNPs-  $\text{Fe}_3\text{O}_4@\text{C}$  NPs system.

Excitation wavelength was 360nm.

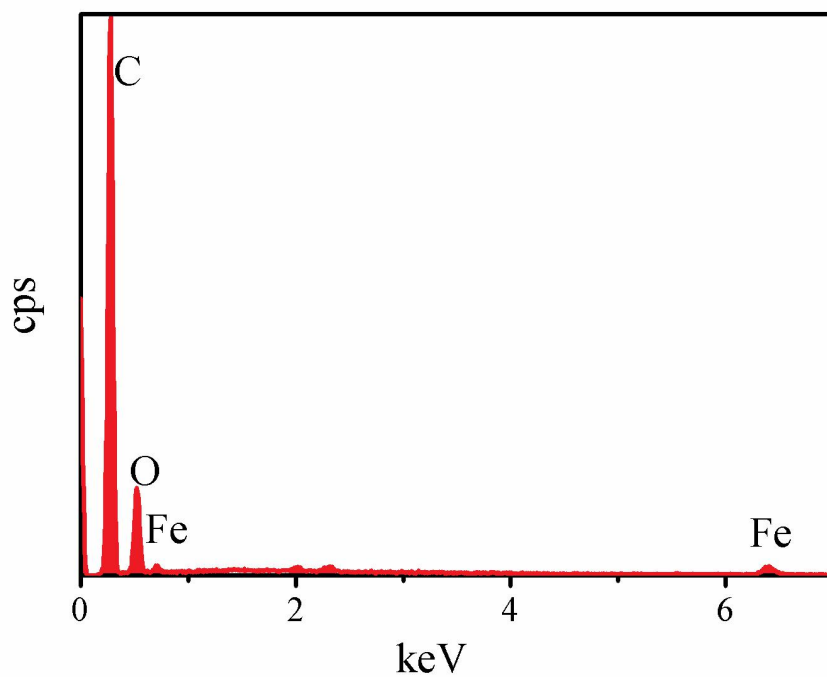

**Figure S2. EDS line scanning images of Fe<sub>3</sub>O<sub>4</sub>@C NPs**

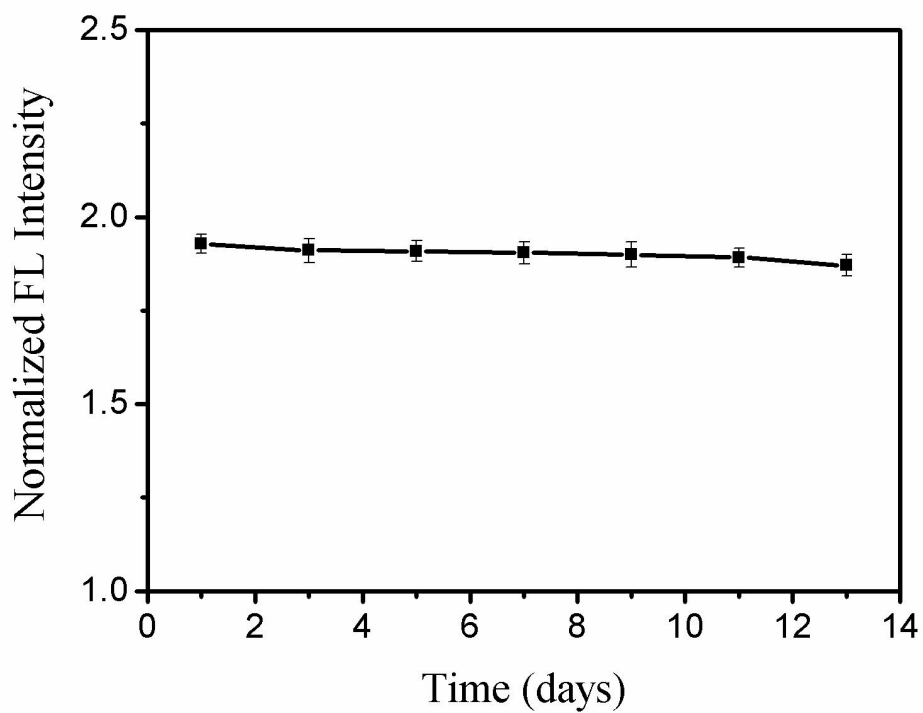

**Figure S3. Effect of time on the normalized fluorescence intensity of the QDs in the Fe<sub>3</sub>O<sub>4</sub>@C@QDs nanocomposite in 10 mM PBS (pH=7.4).**

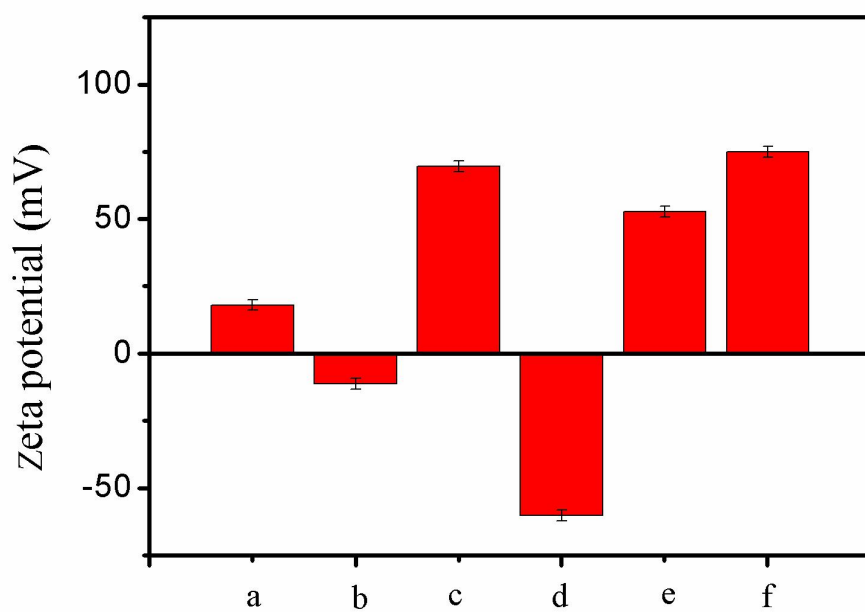

**Figure S4.** Zeta potential of  $\text{Fe}_3\text{O}_4$  NPs,  $\text{Fe}_3\text{O}_4@\text{C}$  NPs, PDDA- $\text{Fe}_3\text{O}_4@\text{C}$  NPs,  $\text{Fe}_3\text{O}_4@\text{C}@\text{QDs}$  NPs, PDDA- $\text{Fe}_3\text{O}_4@\text{C}@\text{QDs}$  NPs, and Anti-IgG- $\text{Fe}_3\text{O}_4@\text{C}@\text{QDs}$  NPs (a-f) in water.
